# Supplementary figures and images for: Electroanalytical sensing of chromium(iii) and (vi) utilising gold screen printed macro electrodes
Source: Royal Society of Chemistry journal article supplement (doi:10.1039/c2an16054d), 2012-01-01

### ESI 1

EDX analysis of the AuSPE surface

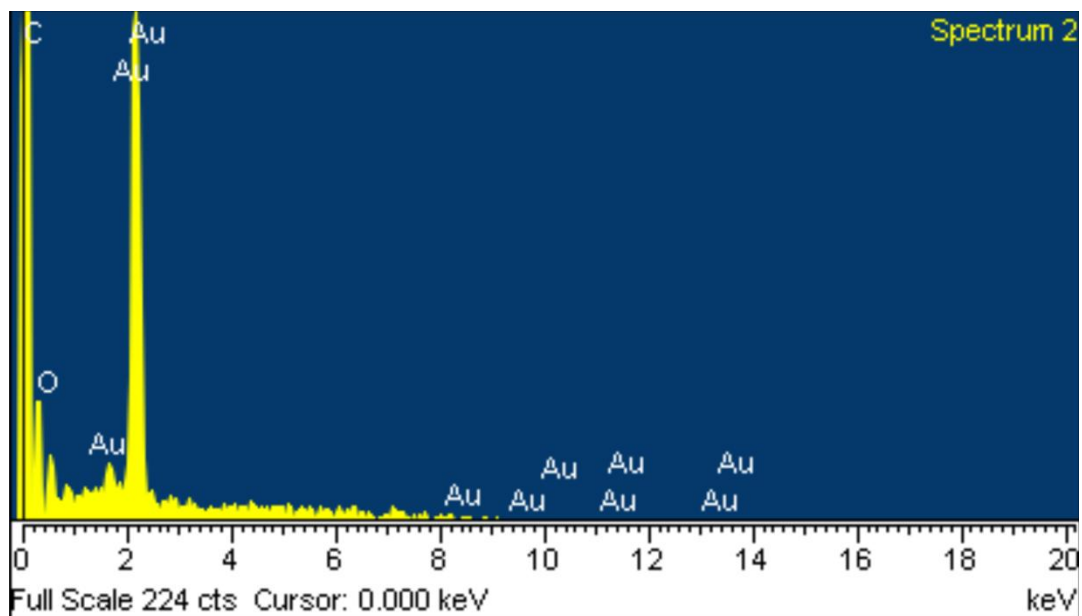

Supplement: c2an16054d.pdf [file c2an16054d.pdf]
